# **Variety of Energy-Dense Foods Does Not Affect Body Mass Index but Influences Food Quantity: Evidence from a Cross-Sectional Study among Adolescents in Mumbai, India**

Elina Dawoodani<sup>1\*</sup>, Chanda Gokhale<sup>2</sup>

<sup>1</sup>Department of Nutrition Science, Purdue University, West Lafayette, Indiana

<sup>2</sup>Department of Food Science and Nutrition, S.N.D.T. Women's University, Mumbai, India

(Retired)

## **Authors' last names for PubMed indexing**

Dawoodani

Gokhale

## **\*Corresponding author**

[edawooda@purdue.edu](mailto:edawooda@purdue.edu) (ED)

## 1 **Abstract**

2 Introduction: Over the past three decades, adolescents' share of caloric consumption from foods  
3 that are energy-dense but low in micronutrients has increased dramatically. Additionally, the rise  
4 in overweight and obesity in this age group is one of the most significant public health challenges  
5 of recent times.

6 Objective: We intended to investigate the relationship between consuming a variety of energy-  
7 dense foods and body mass index in adolescents.

8 Research Methods and Procedures: In this analytical cross-sectional study, 373 adolescents  
9 between the age of 13-15 years old were randomly recruited from three private schools in Mumbai,  
10 India. Data on their weekly consumption of energy-dense foods, anthropometric measurements,  
11 along with other critical information was obtained using a survey and food frequency  
12 questionnaire. Categories of energy-dense foods considered included chat (Indian savory snack)  
13 and street foods, appetizers, main course, continental foods, aerated drinks, baked foods, Indian  
14 sweets, farsan (fried Indian snack), and packaged foods.

15 Results: Amongst the participants (n=373, mean age 13.4 years), 39.7% were underweight, 46.1%  
16 had a normal BMI, 9.6% were overweight, and 4.5% were obese. They reported consuming an  
17 average of 4 varieties and 10.6 servings of energy-dense foods a day. Though the consumption of  
18 a variety of energy-dense foods was not found to be associated with body mass index, it was found  
19 to be significantly, positively, and strongly associated with the number of servings consumed,  
20 indicating that variety does increase total food consumption.

21 Conclusion: In this cohort of adolescents, overall consumption of a variety of energy-dense foods  
22 does not seem to influence body mass index. Longitudinal studies are warranted to assess the  
23 impact of variety on total body composition.

24

## 25 **Introduction**

26 Obesity is the most serious dietary issue afflicting children and adolescents across the world. Obese  
27 children and adolescents suffer from a variety of medical and psychological health complications,  
28 such as hypertension, impaired pulmonary function, sleep apnea, gallstone formation, insulin  
29 resistance, diabetes, low self-esteem, and eating disorders (1). In India alone, the prevalence of  
30 overweight and obesity (OW/O) has increased from 9.7% in 2001 to 19.3% in 2010 (2), and now  
31 to 23.9% in 2021 (3), indicating the need for population-based preventative measures to ensure  
32 that adolescents are not afflicted by chronic health problems at a young age.

33 Among the myriad elements that influence OW/O, two components have been identified to have  
34 a robust effect on food consumption and weight. First, dietary variety, which when in excess causes  
35 hyperphagia, and is associated with the development and maintenance of obesity. (4–11). Animal  
36 and human studies have shown that food consumption increases when there is more variety in a  
37 meal or diet and that greater dietary variety is associated with increased body weight and fat. (12)  
38 It is generally believed that sensory-specific satiety is the mechanism by which variety influences  
39 food intake. (11,13–15).

40 The second component that contributes substantially to OW/O is the consumption of energy-dense  
41 foods (EDF), which often results in energy imbalance, wherein energy intake is greater than energy  
42 expenditure. This is especially relevant in countries like India, where due to nutrition transition,  
43 which was caused by a complex amalgam of marketing, social, and economic activities, has

44 significantly altered the lifestyles and eating patterns, especially of urban Indians (16,17).  
45 Traditional home-cooked meals have been displaced in urban Indian households by high-energy,  
46 ready-to-eat, processed foods as a result of the rapid emergence of multinational fast food chains  
47 in the country's food sector and the influence of Western culture (17,18). Studies have indicated  
48 that the consumption of energy-dense and nutrient-poor foods and sugar-sweetened beverages has  
49 increased substantially, particularly, in Indian urban regions due to food globalization (19–21).  
50 Energy-dense foods, by definition, are those that provide a high number of calories per gram or  
51 serving while offering low amounts of essential nutrients such as vitamins, minerals, and fiber.  
52 According to the World Cancer Research Fund/American Institute for Cancer Research, the cut-  
53 off value for dietary energy density was determined at 900 kJ/100 g (215 KCal/100 g) (22),  
54 equivalent to a high energy density, and based on a recently published paper, foods such as sweets,  
55 chocolate, cake, cookies and biscuits, sweet and salty snacks, sugar-sweetened and artificially  
56 sweetened drinks, and alcoholic drinks are classified as energy dense nutrient-poor food and drinks  
57 (23). Younger generations are more influenced by new foods particularly when these are  
58 introduced through an advertising campaign that targets the group specifically (24). A recent  
59 Indian study has also reported that the risk factors which showed a statistically significant  
60 association with adolescent obesity were increased intake of fast food, increased intake of  
61 chocolates/sweets, inadequate intake of fruits, and freedom given to adolescents in buying snacks  
62 without any restriction by parents (25). Similar findings are also reported in an earlier study, where  
63 dietary pattern characterized by increased intake of carbonated soft drinks, junk food (like pizza,  
64 samosa), sweets/ candies/chewing gums/chocolates, potato chips/popcorns/packed food is  
65 associated with increased risk of these of overweight and obesity among adolescents (26).  
66

67 Although there are multiple pieces of evidence of both dietary variety and consumption of EDF  
68 individually, there are inconsistencies on how these two together affect the prevalence of OW/O  
69 in adolescents globally. Moreover, to our knowledge, there are no studies that have assessed the  
70 relationship between the consumption of variety of energy-dense foods (VEDF) and the prevalence  
71 of OW/O specifically in Indian adolescents. Therefore, the primary goal of the present study was  
72 to identify the relationship between VEDF and BMI among adolescents between the age of 13-15  
73 years belonging to the higher socioeconomic strata in Mumbai, India.

74

75 The secondary objectives of the study were as follows:

- 76 1. To quantify the consumption of VEDF and the number of servings of EDF in this  
77 population
- 78 2. To study the association of the number of servings of energy-dense foods with the BMI of  
79 adolescents.
- 80 3. To identify the prevalence of OW/O in the population using anthropometric measurements.
- 81 4. To identify other factors that would, with or without VEDF, increase BMI in adolescents.

## 82 **Methodology**

83

### 84 **Participants:**

85 The study was limited to healthy adolescents ranging from 13 to 15 years old, belonging to high  
86 socio-economic strata, and providing written consent from the parents or caregivers to participate  
87 in the study. Students who attended private schools were selected since they are generally expected  
88 to enjoy good health due to better health awareness and lack of economic constraints.

89 This cross-sectional study was conducted on 373-school going adolescents living in Mumbai,  
90 India, using the personal interview method of the food frequency questionnaire. Schools were  
91 randomly selected from three different Municipal wards in Mumbai. One school was selected from  
92 wards L, H/E, and H each.

93

### 94 **Sample Size Estimations:**

95 Before the main study commenced, a pilot study of 30 children was undertaken, and this data was  
96 analyzed for reliability. The reliability of the data was computed using Cronbach's alpha, which  
97 shows a value of 0.707. This explains 70.7% of the total variance in the variables included in the  
98 analysis. The general rule is that  $\alpha$  of 0.6-0.7 indicates an acceptable level of reliability, and 0.8 or  
99 greater is a good level (27). Once the reliability of the pilot study was established, the sample size  
100 was estimated based on the census of the total adolescent population in Mumbai, with a 95%  
101 confidence interval and margin of error of 0.5, bringing the total necessary sample size to 384.

102

### 103 **Data Collection:**

104 Data collection was conducted between 3<sup>rd</sup> January and 14<sup>th</sup> April 2015 using the personal  
105 interview method. The survey consisted of general information such as age, gender, occupation,  
106 food preferences, etc. The participants' recall was used to gather information on physical activity,  
107 including the type, duration, and frequency, as well as sleeping schedules. Since our goal was to  
108 understand the effect of VEDF on BMI, variables such as type and level of activity, sleep, etc.  
109 were our potential confounders.

110

111 To understand the consumption of EDF, we identified 206 commonly consumed foods and drinks  
112 that are usually high in fat, added sugars, and sodium, contributing to the energy density of the  
113 meal while containing low levels of important micro-nutrients (28). Using a food frequency  
114 questionnaire, these 206 foods were categorized into 9 different groups, viz; (1) chats (Indian  
115 savory snack) and street foods, (2) main course, (3) appetizers, (4) aerated drinks and juices, (5)  
116 continental foods, (6) desserts and baked foods, (7) Indian sweets, (8) farsan (fried Indian snack),  
117 and (9) packaged snack items, based on their nutritional profiles and culinary categorization. We  
118 recorded the frequency over the period of the last seven days and portion sizes of all these  
119 aforementioned foods. There are various valid time frames for recall, such as the past 3 or 7 days  
120 and in the case of some foods, the past month (29). All these questions were asked in private to  
121 prevent the participants from sharing incorrect information due to peer pressure or embarrassment.  
122 To estimate the serving size of each EDF consumed by adolescents in our study, we used a picture-  
123 based method as there are no standardized serving sizes for all foods, particularly for traditional  
124 dishes or home-cooked meals. We presented participants with pictures of plates, bowls, and other  
125 commonly used containers, and prompted them to report the quantity of each food item they

126 consumed. We then estimated their serving sizes based on their reported quantities and our visual  
127 references.

128

### 129 **Anthropometrics:**

130 Participants' weight and height were measured using calibrated instruments. Autocal Solutions  
131 Private Limited, Mumbai, calibrated the weighing scale (Titanshah 2003A) and measuring tape  
132 prior to the data collection. BMI was calculated as weight in kilograms per height in meters  
133 squared. BMI z-score (zBMI) was calculated using the Centers for Disease Control and Prevention  
134 (CDC) modified growth reference standards (38).

135

### 136 **Ethics:**

137 The study tools and research methodologies were subjected to standard ethical approval. All the  
138 procedures used in this study were reviewed and approved in writing by the Inter System  
139 Biomedica Ethics Committee (ISBEC), Vile Parle (West), Mumbai. Prior to data collection, the  
140 principals of the respective schools were approached. After acquiring permission from the  
141 authorities, the students were addressed and given a small booklet that had both a consent letter  
142 and volunteer information sheet. This sheet provided them with all the necessary information  
143 related to the project. The students were asked to take the booklet home so that the information  
144 could be passed on to the parents too. If the child and the parent/guardian were willing to  
145 participate, informed written consent was taken. We ensured that the confidentiality of participants  
146 was maintained throughout the study.

147

### 148 **Statistical Analysis:**



149 Data entry and coding were done using Microsoft Excel 2010 and analysis was conducted using  
150 the R package (Version 4.1.3). Data points that did not fall within three SD of the mean were  
151 identified as outliers and removed (30). Kolmogorov-Smirnov non-parametric tests were then  
152 carried out to measure the goodness of fit and establish that the sample had a normal distribution.  
153 Due to the large sample size, the sampling distribution was considered to be approximately normal  
154 and robust for parametric testing using the central limit theorem (31). Marginal distributions were  
155 examined to identify the prevalence of underweight, normal weight, and OW/O in the given  
156 population. Independent t-tests were used to examine if mean VEDF differed significantly by  
157 gender and age. Spearman's correlations were then carried out to examine whether there is a  
158 significant association between the response variable, zBMI, and predictor variables, such as  
159 VEDF, %VEDF, number of servings of EDF, % variety of each food group, number of time and  
160 duration of exercise, and duration of sleep. Regression analyses and linear-by-linear associations  
161 were done to test if there is a causal relationship between zBMI and VEDF, %VEDF, number of  
162 servings, income, sleep, and each of the food groups individually. Furthermore, confounders were  
163 identified using correlation matrices, added to the regression models, and re-run. The variance  
164 inflation factor was calculated to gauge if the variance of VEDF is influenced, or inflated, by its  
165 interaction/correlation with the other independent variables. Additionally, Somers' delta was used  
166 to assess the relationship between ordinal values of VEDF and BMI. Lastly, odds ratios were  
167 estimated to predict the odds of developing OW/O due to the consumption of VEDF and the  
168 number of serving of EDF. Statistical significance for all analyses was set at  $p < 0.05$ .

169

## 170 **Results and Interpretations**

171

## 172 **Population Characteristics:**

173 A total of 373 school-going adolescents were recruited into the study. Amongst the participants,  
174 56.8% (n=212) were between 13-14 years old, 62.19% (n=232) were girls, and most of the  
175 participants were non-vegetarians (89.5%, n=334).

Table 1

### *Socio-Demographic Factors*

| Measures        | <i>M</i> | <i>SE</i> | Median | <i>SD</i> | Range    |
|-----------------|----------|-----------|--------|-----------|----------|
|                 |          |           |        |           | 13.1 -   |
| Age (years)     | 13.43    | 0.03      | 13.00  | 0.50      | 14.11    |
| Height (in cms) | 152.69   | 0.44      | 153.00 | 8.59      | 124- 180 |
|                 |          |           |        |           | 23.80 -  |
| Weight (in kgs) | 48.09    | 0.64      | 45.70  | 12.31     | 96.10    |
|                 |          |           |        |           | 13.50 -  |
| BMI             | 20.26    | 0.23      | 19.40  | 4.45      | 41.50    |

*Note: N= 373*

176

## 177 **Body Mass Index:**

178 Based on the measurements, 39.7% (n= 149) of our participants were underweight, 46.1% (n=  
179 173) had a normal BMI, 9.6% (n=36) were overweight, and 4.5% (n=17) were obese.

180

### 181 **Physical activity:**

182 All 373 participants were involved in some form of daily physical activity. 41.01% (n=153)  
183 performed aerobic exercises, 35.12% (n= 131) performed aerobics combined with balancing, and  
184 13.3 % (n= 50) performed aerobic activities with resistance workouts. An exceedingly small  
185 percentage of children were involved in only balancing or only resistance workouts (5.6%, n=21),  
186 while only 1.9% (n = 7) performed all three types of activities. Moreover, 55% (n= 205) exercise  
187 for more than 30 minutes, 23% (n=86) exercise for 30 mins, and 21.9% (n= 82) exercise for less  
188 than 30 minutes daily. Note that playing outdoors was considered an aerobic activity.

189

### 190 **Sleeping Patterns of the Subjects:**

191 We found that 42.9% (n=161) of the participants usually slept for 8 hours a day, 41.2% (n=154)  
192 slept for less than 8 hours and 15.5% (n= 58) slept for more than 8 hours. It was also observed that  
193 55.7% (n= 209) do not sleep during the day, while 44.3% (n= 166) of the participants usually sleep  
194 during the daytime. Of the total number of participants who sleep during the daytime, most of them  
195 take a nap for more than 30 minutes and a smaller percentage sleep for 30 minutes or less.

196

### 197 **Variety and Servings of Energy-Dense Foods:**

198 We found that the mean VEDF of the population was 27.98/week (SD: 16.33, median: 25),  
199 suggesting that these adolescents consumed approximately 4 varieties of EDF every day.  
200 Furthermore, they reported consuming a mean of 74.22 (SD: 48.4, median: 61) servings a week,

201 indicating that they consumed approximately 10.60 servings of EDF a day. The mean variety per  
202 week of each food group is presented in Table 2:

203

204 Table 2: Mean variety/week of each food group:

205

| Food Groups               | <i>Mean</i> | <i>SD</i> | <i>Median</i> |
|---------------------------|-------------|-----------|---------------|
| Chats and street foods    | 7.69        | 4.52      | 7.0           |
| Main course               | 3.12        | 12.11     | 2.0           |
| Starters                  | 2.52        | 2.31      | 2.0           |
| Aerated drinks and juices | 4.08        | 3.47      | 3.0           |
| Continental foods         | 1.74        | 1.95      | 1.0           |
| Desserts and baked foods  | 4.02        | 2.83      | 4.0           |
| Indian sweets             | 2.58        | 2.74      | 2.0           |
| Farsan                    | 0.91        | 1.13      | 1.0           |
| Packaged snack items      | 1.75        | 1.80      | 1.0           |

206

207

## 208 **Association between VEDF and zBMI:**

209 Regression analysis of our data showed no significant association (F-statistic: 2.262,  $p = 0.1334$ )

210 between VEDF and BMI (Table3), indicating that consumption of VEDF was not a significant

211 predictor of BMI in this group (**Fig1**). Furthermore, after adding covariates and using multiple

212 linear regression, the relationship between VEDF and BMI did not change. Since BMI is an ordinal

213 variable, we also gauged linear by linear association analysis using Somer's delta as a measure of

214 agreement between predictors and the response variable, BMI for each of the food categories. It  
215 was observed that the variety and number of servings of all nine food groups were not associated  
216 with BMI.

217

218 Fig1: Relationship between zBMI and the variety of energy-dense foods consumed by 373  
219 adolescents aged 13-15 years.

220

### 221 **Association between the number of servings of EDF and BMI:**

222 Linear regression of the number of servings revealed no significant association with BMI (F-  
223 statistic: 3.168,  $p=0.07592$ ) (Table3), indicating no role of servings of EDF on BMI (Fig 2). To  
224 investigate the effect of VEDF on the total number of servings, regression analysis was also  
225 conducted between the two, and a positive significant association was detected (F-statistic: 2858,  
226  $p: <2e-16$ ). Based on our coefficient of determination ( $R^2$ ), we can state that around 88.43% of  
227 the change in the number of servings is accounted for by the VEDF. To verify, the variance  
228 inflation test using both VEDF and number of servings as predictors and BMI as the response  
229 variable was conducted, and it gave us results close to 1, indicating no multicollinearity between  
230 the two predictor variables.

231 We further conducted the odds ratio for the number of servings of EDF to understand how it affects  
232 the odds of an increase in BMI. On analysis, we found the odds ratio of 0.99 indicating that there  
233 is no association between the occurrence of OW/O and the number of servings of EDF consumed  
234 in this population.

235

236 Fig 2: Relationship between zBMI and the number of servings of energy-dense foods consumed  
237 by 373 adolescents aged 13-15 years.

238

239

## 240 **Association between sleep and physical activity with BMI:**

241 Although spearman's correlation found a significant inverse association between duration of sleep  
242 and zBMI (S= 9572, p-value= 0.0163, rho= -0.125), regression analysis revealed that there is no  
243 causative effect of sleep duration and zBMI in the present sample (F-value=2.402, p= 0.122)  
244 (Table3). Similarly, no significant association was found between the duration of exercise and  
245 BMI (F-value = 2.297, p= 0.1305) (Supplementary material). The number of times exercises were  
246 performed and their effect on BMI was also studied, and it was observed that the two are not  
247 significantly correlated. (F value= 2.019, p= 0.1562)

248

249

## 250 **Discussions**

251

252 Given the rise in the prevalence of obesity among children and adolescents, effective preventative  
253 programs are needed to focus on the etiologic components that are most receptive to modification.

254 In this study, we sought to examine the effect of one such component, that is, dietary variety of  
255 energy-dense foods, on BMI among adolescents living in Mumbai, India. On analysis, three key  
256 findings emerged from this investigation. First, no significant association was detected between  
257 VEDF and zBMI. Though there aren't many research papers that have looked into the variety of  
258 EDF, our findings are consistent with several studies that found no correlation between the dietary  
259 energy density (DED) of foods and BMI in adolescents (32-36). The possible causes for the  
260 absence of association in this demographic are their high physical activity, which has been

261 established to cancel the effect of EDF on their weight (37), an alarming number of underweight  
262 participants in the study, and the possibility of these participants compromising on regular, healthy  
263 meals by consuming EDF. It is imperative to also emphasize that the data for adults are far more  
264 consistent than for adolescents because a vast number of studies on adults have yielded clear  
265 conclusions (38,39). This implies that the processes by which DED occurs in adolescence differ  
266 from those reported both during adulthood when the predisposition for fat storage is larger (40),  
267 and in childhood when the response to fluctuations in energy density appears to occur innately  
268 (41,42).

269  
270 The second key finding of the study is that participants consumed four varieties and ten servings  
271 of EDF on average per day, which is higher than the consumption reported in other countries  
272 (34,42). However, similar to our findings, a recent study conducted on adolescents residing in  
273 Kolkata, India, reported an intake of 6.25 servings of energy-dense snacks and 3 or more energy-  
274 dense beverages per day (42). Together, these two studies demonstrate that adolescents in India  
275 have poor dietary patterns. The fact that despite high consumption of EDF, the BMI of these  
276 adolescents is unaffected is especially a matter of concern due to the prevalence of the thin-fat  
277 phenotype in South Asian countries, including India. This phenotype causes individuals to have  
278 normal body weight (as measured by BMI) but a disproportionately high body fat percentage (44).  
279 There is evidence of a high risk associated with the epidemic of noncommunicable chronic  
280 diseases, and studies have also indicated that mortality associated with this phenotype is also  
281 significantly higher than in non-obese subjects (45). Additionally, it is known that Asians tend to  
282 have low BMI but high body fat percentage as compared to other ethnicities, which we hypothesize  
283 is the case with this population (46).

284

285 Third, no detectable association was found between the number of servings and adolescents'  
286 zBMI. Though surprising, this finding is in line with studies in the past that have established that  
287 there is no “direct causal” link between portion sizes and obesity in the long term because energy  
288 intakes are a function of not only the portion size of food but also its energy density and the  
289 frequency of food and beverage consumption, among several other factors (47,48). However, we  
290 did find a strong positive association between VEDF and serving sizes, suggesting that consuming  
291 a variety of energy-dense foods augments the number of servings consumed by adolescents in this  
292 sample.

293

294 Our participants displayed some surprising characteristics. According to WHO, the global  
295 prevalence of obesity during adolescence in 2016 was 18% (49). Relative to those numbers, the  
296 prevalence of obesity in our study (4.5%) was much less. In fact, in the present study, many  
297 adolescents were underweight (39.7%) which is a matter of concern, especially given that these  
298 adolescents belonged to a higher socioeconomic status. The low prevalence of OW/O could also  
299 be attributed to the fact that all subjects regularly participate in aerobic physical activity, which is  
300 incorporated into the school schedule. This also explains the lack of correlation between VEDF  
301 and the number of servings of EDF with BMI as seen in the present study, since very few  
302 participants belonged to the OW/O category.

303

304 To our knowledge, the current study is the only one thus far that has attempted to investigate the  
305 relationship between VEDF, in specific, with BMI in Indian adolescents. Strengths of our study  
306 include a large sample size (n=373) and a high response rate. Given that adolescents frequently



307 consume high-calorie foods and the fact that obesity is on the rise, the present study was also of  
308 public health relevance. We constructed indices of dietary variety to differentiate foods into  
309 categories that are commonly consumed by adolescents living in the given demographic.

310

311 Our analysis also has some important limitations. (i) The cross-sectional design of our study does  
312 not allow for causality conclusions, (ii) the self-reporting of information regarding dietary variety,  
313 portion sizes, sleep schedule, and physical activity is a source of bias. Moreover, since the foods  
314 are not weighed or quantified using household utensils in typical FFQs (Food Frequency  
315 Questionnaire), they tend to be less accurate compared to other quantitative dietary assessment  
316 methods including 24-hour Dietary Recalls and Weighed Food Records (50,51), (iii) We also had  
317 to curate our own FFQ because there are no questionnaires that focus only on VEDF. However,  
318 since the questionnaire is not a validated one, it adds to the limitations of our study. (iv)  
319 Additionally, adolescence is a time of critical reproductive and overall growth. Therefore, BMI  
320 alone isn't sufficient, and measurement of body fat percentage would have served as a better  
321 indicator of OW/O.

322

323 Nonetheless, our results confirm the findings of previous, similar studies. Longitudinal data are  
324 necessary to further unravel the complex interplay between the outcome and the above-mentioned  
325 covariates. Adolescents could be randomized into distinct groups and supplemented with energy-  
326 dense foods in different varieties to see the causal relationship between VEDF and BMI.  
327 Additionally, future studies could assess the effects of VEDF on body fat percentage to elucidate  
328 the implications of excess EDF consumption and identify the presence of thin fat phenotype among  
329 Indian adolescents.

330

## 331 **Conclusion**

332

333 The findings of the current study suggest that there is no significant association between the  
334 consumption of a variety of energy-dense foods and BMI, suggesting that VEDF does not play a  
335 key role in explaining the variability in BMI in this population. High levels of physical activity, a  
336 large percentage of underweight individuals in this demographic, and the difference in mechanisms  
337 by which adiposity affects adolescents could all contribute to this lack of association. This lack of  
338 relationship is consistent with previous studies that have investigated the effect of overall dietary  
339 energy density on BMI in adolescents. However, we did find that VEDF increases the number of  
340 servings consumed. This is a matter of concern since in urban areas, and with an open economy,  
341 the variety of food has increased and is readily available. Therefore, adolescents belonging to  
342 families with no financial constraints are particularly vulnerable. To conclude, longitudinal studies  
343 are warranted to see the impact of variety on BMI, and more so, on body composition.

## 344 **Acknowledgments**

345 The authors express their gratitude to Anali Morales and Qianyue Wang from Purdue University  
346 for their valuable contributions in conducting statistical analysis of the data.

## References

1. Fruh SM. Obesity: Risk factors, complications, and strategies for sustainable long-term weight management. *J Am Assoc Nurse Pract*. 2017 Oct;29(Suppl 1):S3–14.
2. Ranjani H, Mehreen TS, Pradeepa R, Anjana RM, Garg R, Anand K, et al. Epidemiology of childhood overweight & obesity in India: A systematic review. *Indian J Med Res*. 2016 Feb;143(2):160–74.
3. Seema S, Rohilla KK, Kalyani VC, Babbar P. Prevalence and contributing factors for adolescent obesity in present era: Cross-sectional Study. *J Fam Med Prim Care*. 2021 May;10(5):1890–4.
4. Embling R, Pink AE, Gatzemeier J, Price M, D Lee M, Wilkinson LL. Effect of food variety on intake of a meal: a systematic review and meta-analysis. *Am J Clin Nutr*. 2021 Mar 11;113(3):716–41.
5. Hetherington MM, Foster R, Newman T, Anderson AS, Norton G. Understanding variety: tasting different foods delays satiation. *Physiol Behav*. 2006 Feb 28;87(2):263–71.
6. Johnson F, Wardle J. Variety, Palatability, and Obesity<sup>1234</sup>. *Adv Nutr*. 2014 Nov 3;5(6):851–9.
7. Meiselman HL, deGraaf C, Leshner LL. The effects of variety and monotony on food acceptance and intake at a midday meal. *Physiol Behav*. 2000 Jul 1;70(1–2):119–25.
8. Raynor HA, Vadiveloo M. Understanding the Relationship Between Food Variety, Food Intake, and Energy Balance. *Curr Obes Rep*. 2018 Mar;7(1):68–75.
9. Roe LS, Meengs JS, Birch LL, Rolls BJ. Serving a variety of vegetables and fruit as a snack increased intake in preschool children. *Am J Clin Nutr*. 2013 Sep;98(3):693–9.

10. Rolls BJ. Experimental analyses of the effects of variety in a meal on human feeding. *Am J Clin Nutr*. 1985 Nov;42(5 Suppl):932–9.
11. Rolls BJ, Rowe EA, Rolls ET. How sensory properties of foods affect human feeding behavior. *Physiol Behav*. 1982 Sep;29(3):409–17.
12. Raynor HA, Epstein LH. Dietary variety, energy regulation, and obesity. *Psychol Bull*. 2001 May;127(3):325–41.
13. Brondel L, Romer M, Van Wymelbeke V, Pineau N, Jiang T, Hanus C, et al. Variety enhances food intake in humans: role of sensory-specific satiety. *Physiol Behav*. 2009 Apr 20;97(1):44–51.
14. Snoek HM, Huntjens L, van Gemert LJ, de Graaf C, Weenen H. Sensory-specific satiety in obese and normal-weight women. *Am J Clin Nutr*. 2004 Oct 1;80(4):823–31.
15. Tseng M, Grigsby CJ, Austin A, Amin S, Nazmi A. Sensory-Related Industrial Additives in the US Packaged Food Supply. *Front Nutr*. 2022 Jan 13;8:762814.
16. Bishwajit G. Nutrition transition in South Asia: the emergence of non-communicable chronic diseases. *F1000Research*. 2015 Nov 24;4:8.
17. Kumar GS, Kulkarni M, Rathi N. Evolving Food Choices Among the Urban Indian Middle-Class: A Qualitative Study. *Front Nutr* [Internet]. 2022 [cited 2023 Jan 7];9. Available from: <https://www.frontiersin.org/articles/10.3389/fnut.2022.844413>
18. Law C, Green R, Kadiyala S, Shankar B, Knai C, Brown KA, et al. Purchase trends of processed foods and beverages in urban India. *Glob Food Secur*. 2019 Dec;23:191–204.
19. Gulati S, Misra A. Sugar Intake, Obesity, and Diabetes in India. *Nutrients*. 2014 Dec 22;6(12):5955–74.
20. Hu FB. Globalization of Diabetes. *Diabetes Care*. 2011 Jun;34(6):1249–57.

21. Kennedy G, Nantel G, Shetty P, Food and Agriculture Organization of the United Nations. Globalization of food systems in developing countries: impact on food security and nutrition. *FAO Food Nutr Pap.* 2004;83:1–300.
22. Mj G. Food, nutrition, and the prevention of cancer : a global perspective. American Institute for Cancer Research/World Cancer Research Fund, American Institute for Cancer Research, 1997. *Nutrition.* 1999;15:523–6.
23. Nutrient-Poor Food and Drinks and Estimating the Amount of Discretionary Energy. *Nutrients.* 2022 Apr 1;14(7):1477.
24. Pingali P, Khwaja Y. Globalization of India Diets and the Transformation of Food Supply Systems. 2004 Feb 1;
25. Grace GA, Edward S, Gopalakrishnan S. Dietary Habits and Obesity among Adolescent School Children: A Case Control Study in an Urban Area of Kancheepuram District. *Indian J Community Med Off Publ Indian Assoc Prev Soc Med.* 2021;46(4):637–40.
26. Marathe N, Sharma A, Jain C, Jain A, Jain P. Dietary Patterns and Association with Overweight and Obesity among Adolescents of Rewa City, Madhya Pradesh. *J Clin Diagn Res [Internet].* 2020 [cited 2023 Jan 7]; Available from: [https://jcdhr.net/article\\_fulltext.asp?issn=0973-709x&year=2020&volume=14&issue=8&page=LC01&issn=0973-709x&id=13962](https://jcdhr.net/article_fulltext.asp?issn=0973-709x&year=2020&volume=14&issue=8&page=LC01&issn=0973-709x&id=13962)
27. Tavakol M, Dennick R. Making sense of Cronbach’s alpha. *Int J Med Educ.* 2011 Jun 27;2:53–5.
28. Biltoft-Jensen A, Matthiessen J, Hess Ygil K, Christensen T. Defining Energy-Dense, Nutrient-Poor Food and Drinks and Estimating the Amount of Discretionary Energy. *Nutrients.* 2022 Apr 1;14(7):1477.

29. Cade J, Thompson R, Burley V, Warm D. Development, validation and utilisation of food-frequency questionnaires - a review. *Public Health Nutr.* 2002 Aug;5(4):567–87.
30. Kwak SK, Kim JH. Statistical data preparation: management of missing values and outliers. *Korean J Anesthesiol.* 2017 Aug;70(4):407–11.
31. Sawada T. Conditions of the Central-Limit Theorem Are Rarely Satisfied in Empirical Psychological Studies. *Front Psychol.* 2021 Nov 8;12:762418.
32. Kring SII, Heitmann BL. Fiber intake, not dietary energy density, is associated with subsequent change in BMI z-score among sub-groups of children. *Obes Facts.* 2008;1(6):331–8.
33. Murakami K, Miyake Y, Sasaki S, Tanaka K, Arakawa M. An energy-dense diet is cross-sectionally associated with an increased risk of overweight in male children, but not in female children, male adolescents, or female adolescents in Japan: the Ryukyus Child Health Study. *Nutr Res N Y N.* 2012 Jul;32(7):486–94.
34. Phillips SM, Bandini LG, Naumova EN, Cyr H, Colclough S, Dietz WH, et al. Energy-Dense Snack Food Intake in Adolescence: Longitudinal Relationship to Weight and Fatness. *Obes Res.* 2004;12(3):461–72.
35. van Sluijs EMF, Sharp SJ, Ambrosini GL, Cassidy A, Griffin SJ, Ekelund U. The independent prospective associations of activity intensity and dietary energy density with adiposity in young adolescents. *Br J Nutr.* 2016 Mar 14;115(5):921–9.
36. Zhou X, Xue H, Duan R, Liu Y, Zhang L, Harvey L, et al. The Cross-Sectional Association of Energy Intake and Dietary Energy Density with Body Composition of Children in Southwest China. *Nutrients.* 2015 Jul 3;7(7):5396–412.
37. Dionne I, Alméras N, Bouchard C, Tremblay A. The association between vigorous physical

- activities and fat deposition in male adolescents. *Med Sci Sports Exerc.* 2000 Feb;32(2):392–5.
38. Arango-Angarita A, Rodríguez-Ramírez S, Serra-Majem L, Shamah-Levy T. Dietary Energy Density and Its Association with Overweight or Obesity in Adolescents: A Systematic Review of Observational Studies. *Nutrients* [Internet]. 2018 Nov [cited 2023 Jan 4];10(11). Available from: <https://www.ncbi.nlm.nih.gov/pmc/articles/PMC6266059/>
39. Rouhani MH, Haghghatdoost F, Surkan PJ, Azadbakht L. Associations between dietary energy density and obesity: A systematic review and meta-analysis of observational studies. *Nutr Burbank Los Angel Cty Calif.* 2016 Oct;32(10):1037–47.
40. Mancuso P, Bouchard B. The Impact of Aging on Adipose Function and Adipokine Synthesis. *Front Endocrinol.* 2019 Mar 11;10:137.
41. Birch LL, Deysher M. Caloric compensation and sensory specific satiety: evidence for self-regulation of food intake by young children. *Appetite.* 1986 Dec;7(4):323–31.
42. Laguna-Camacho A, Castro-Nava GA, López-Arriaga JA. Episodic Frequency of Energy-Dense Food Consumption in Women with Excessive Adiposity. *BioMed Res Int.* 2017;2017:5910174.
43. Rathi N, Riddell L, Worsley A. Food consumption patterns of adolescents aged 14-16 years in Kolkata, India. *Nutr J.* 2017 Aug 24;16(1):50.
44. Kapoor N. Thin Fat Obesity: The Tropical Phenotype of Obesity. In: Feingold KR, Anawalt B, Boyce A, Chrousos G, de Herder WW, Dhatariya K, et al., editors. *Endotext* [Internet]. South Dartmouth (MA): MDText.com, Inc.; 2000 [cited 2023 Jan 8]. Available from: <http://www.ncbi.nlm.nih.gov/books/NBK568563/>
45. Kurpad AV, Varadharajan KS, Aeberli I. The thin-fat phenotype and global metabolic

- disease risk. *Curr Opin Clin Nutr Metab Care*. 2011 Nov;14(6):542–7.
46. Deurenberg P, Deurenberg-Yap M, Guricci S. Asians are different from Caucasians and from each other in their body mass index/body fat per cent relationship. *Obes Rev Off J Int Assoc Study Obes*. 2002 Aug;3(3):141–6.
47. Livingstone MBE, Pourshahidi LK. Portion Size and Obesity<sup>123</sup>. *Adv Nutr*. 2014 Nov 3;5(6):829–34.
48. Reily NM, Herman CP, Vartanian LR. Portion-size preference as a function of individuals' body mass index. *Obes Sci Pract*. 2016 Aug 1;2(3):241–7.
50. Bailey RL. Overview of Dietary Assessment Methods for Measuring Intakes of Foods, Beverages, and Dietary Supplements in Research Studies. *Curr Opin Biotechnol*. 2021 Aug;70:91–6.
51. Shim JS, Oh K, Kim HC. Dietary assessment methods in epidemiologic studies. *Epidemiol Health*. 2014 Jul 22;36:e2014009.



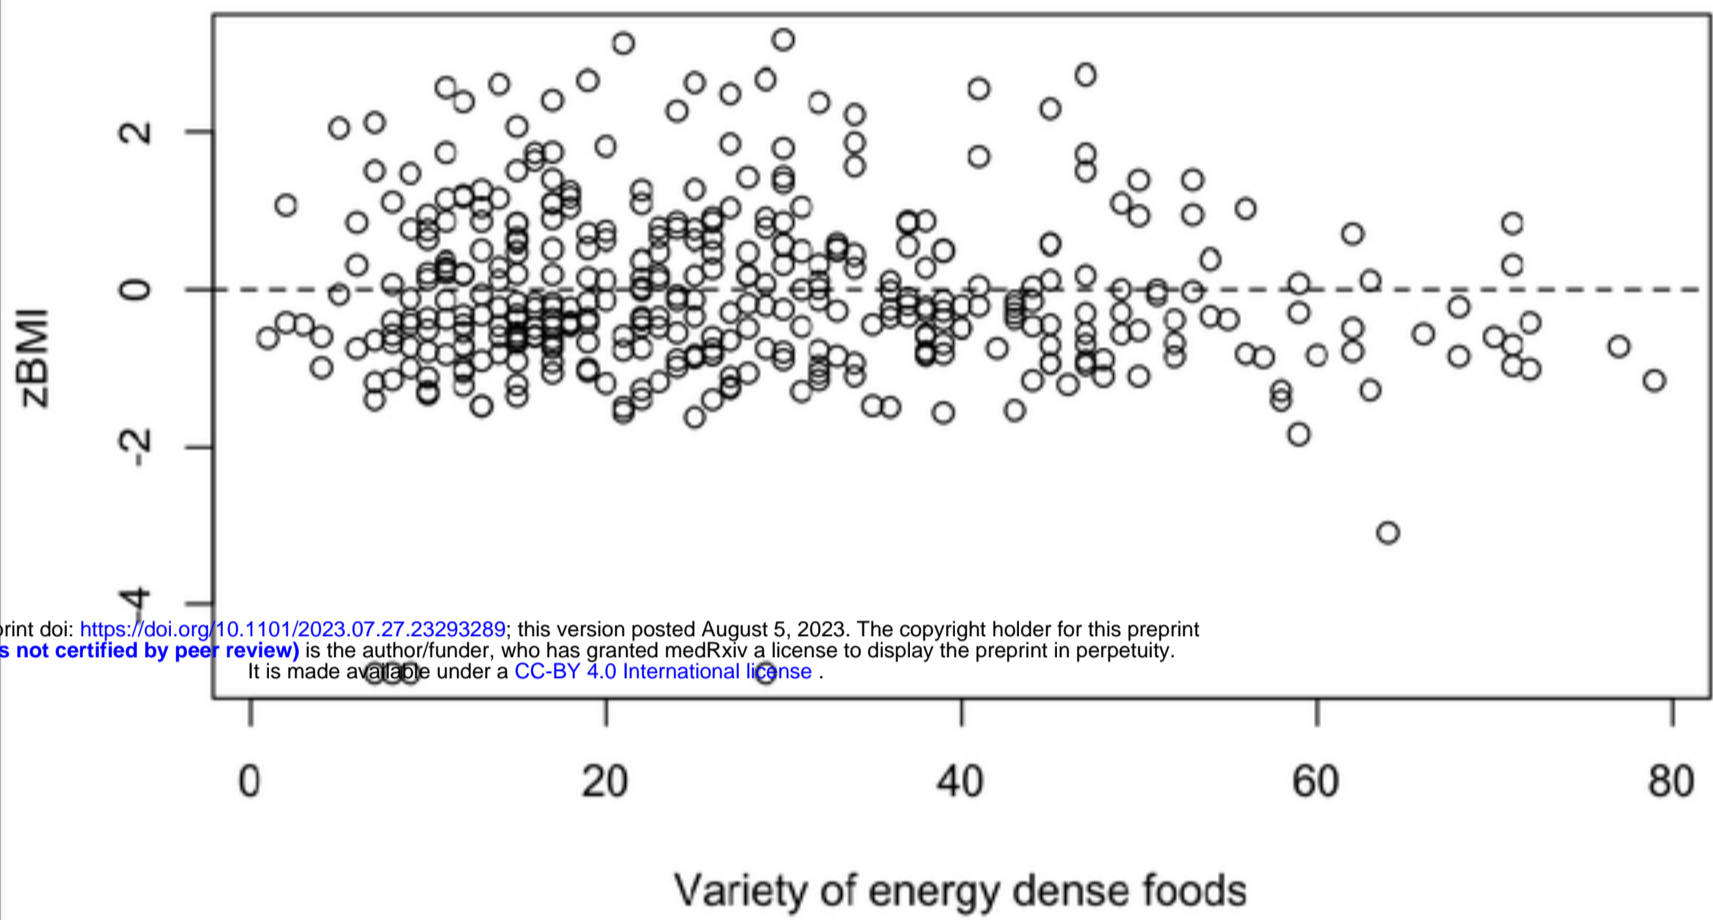

Figure1

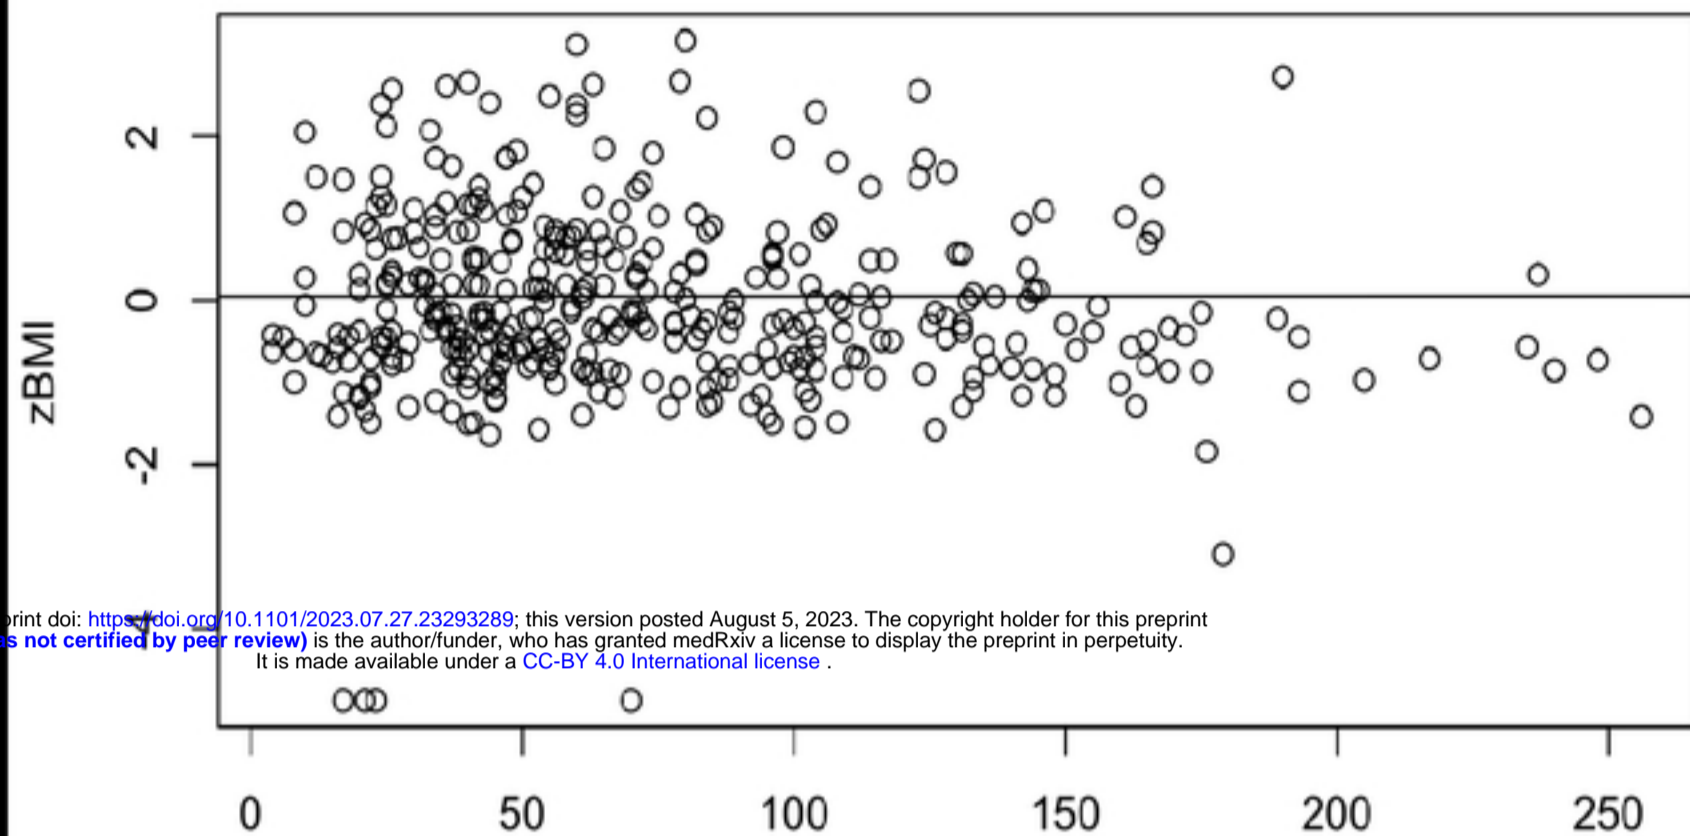

Preprint doi: <https://doi.org/10.1101/2023.07.27.23293289>; this version posted August 5, 2023. The copyright holder for this preprint (which was not certified by peer review) is the author/funder, who has granted medRxiv a license to display the preprint in perpetuity. It is made available under a [CC-BY 4.0 International license](https://creativecommons.org/licenses/by/4.0/).

Figure2
